# Supplementary material for: The Role of Cutibacterium acnes in Intervertebral Disc Inflammation
Source: PubMed Central journal article supplement (PMC7400222; doi:10.3390/biomedicines8070186), 2020-06-30
Supplement: biomedicines-08-00186-s001.pdf [file biomedicines-08-00186-s001.pdf]

## Supplementary materials

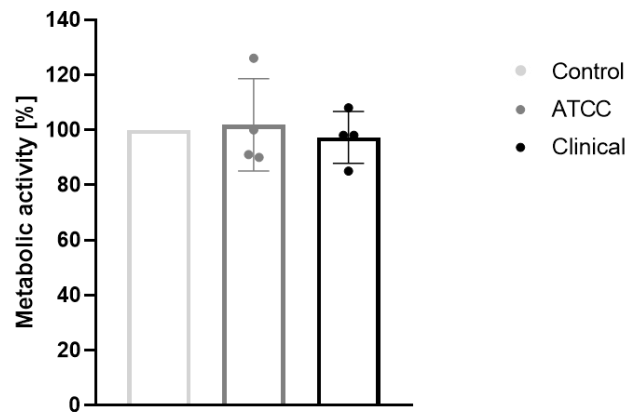

**Supplementary Figure 1.** Metabolic activity of IVD cells infected with the ATCC (grey) or clinical (black) *C. acnes* strain. Values are normalized to metabolic activity of untreated IVD cells (control in light grey).
